# Supplementary material
Source: Springer Nature journal article supplement (https://www.springermedizin.de/resource/supplementary/12985_2012_2126_MOESM9_ESM.pdf/9606092)
Supplement: MOESM9 [file 9606092]

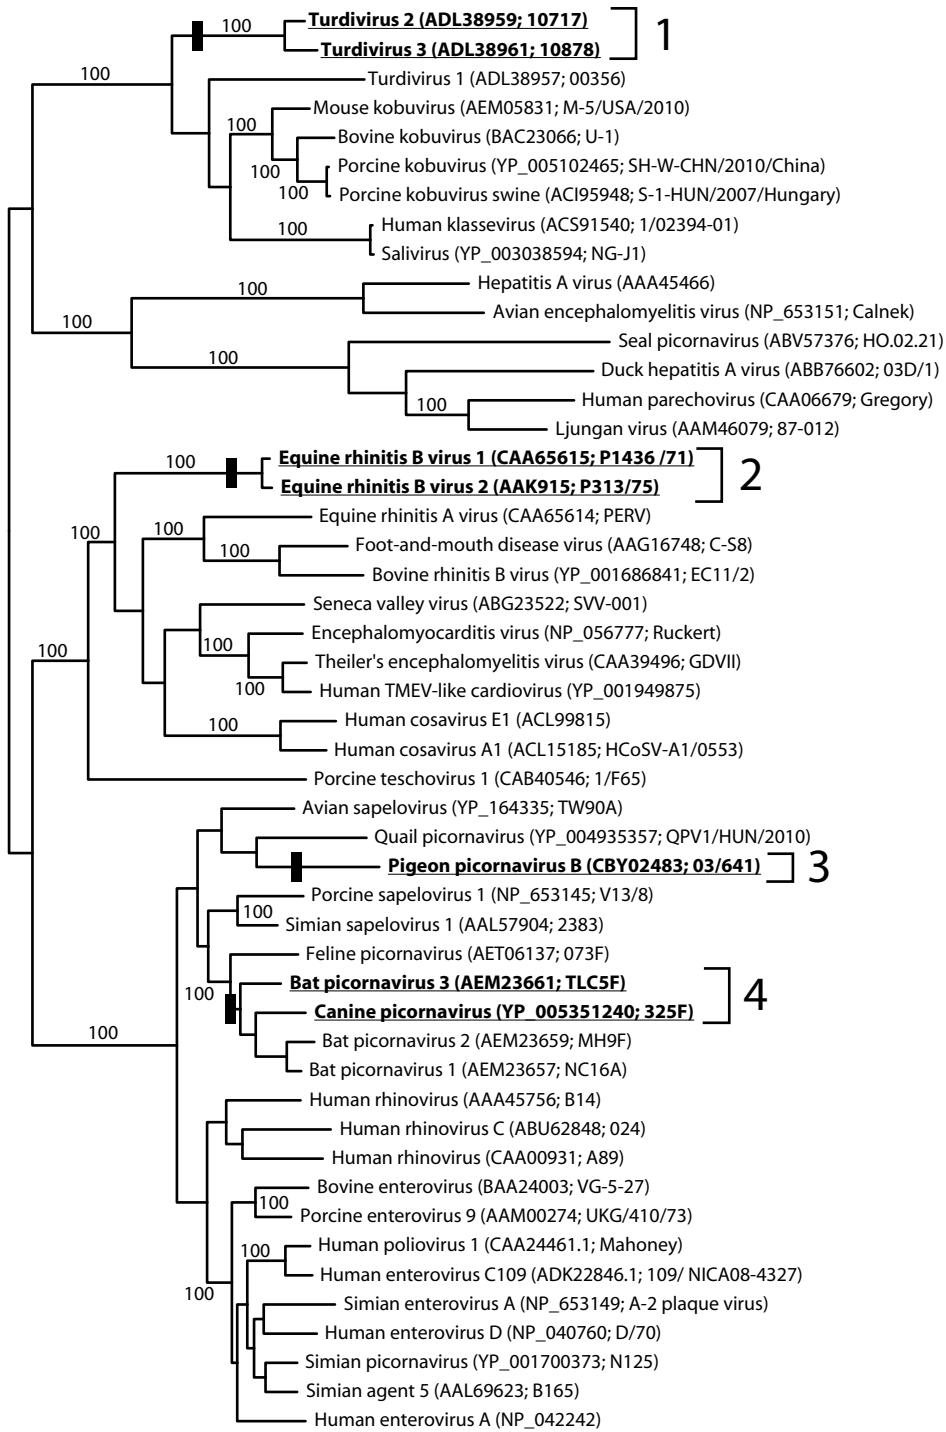

| rank | item | $\Delta \ln$ | AU       | np       | bp    | pp        | kh    | sh    | wkh   | wsh   | constraint | # gains       |
|------|------|--------------|----------|----------|-------|-----------|-------|-------|-------|-------|------------|---------------|
| 1    | 1    | -29.1        | 0.999    | 0.999    | 0.999 | 1         | 0.996 | 1     | 0.996 | 1     | none       | 4             |
| 12   | 2    | 939          | 2.00E-67 | 1.00E-19 | 0     | 0         | 0     | 0     | 0     | 0     | (1,2,3,4)  | 1             |
| 5    | 3    | 318.5        | 4.00E-36 | 2.00E-14 | 0     | 5.00E-139 | 0     | 0     | 0     | 0     | (1,2)      | 3             |
| 8    | 4    | 522.9        | 4.00E-04 | 1.00E-05 | 0     | 8.00E-228 | 0     | 0     | 0     | 0     | (1,3)      | 3             |
| 9    | 5    | 550          | 6.00E-45 | 5.00E-16 | 0     | 1.00E-239 | 0     | 0     | 0     | 0     | (1,4)      | 3             |
| 4    | 6    | 300.8        | 7.00E-71 | 8.00E-21 | 0     | 2.00E-131 | 0     | 0     | 0     | 0     | (2,3)      | 3             |
| 6    | 7    | 410.6        | 3.00E-06 | 4.00E-07 | 0     | 5.00E-179 | 0     | 0     | 0     | 0     | (2,4)      | 3             |
| 3    | 8    | 156.2        | 9.00E-07 | 3.00E-07 | 0     | 1.00E-68  | 0     | 0.003 | 0     | 0     | (3,4)      | 3             |
| 2    | 9    | 29.1         | 0.001    | 0.001    | 0.001 | 2.00E-13  | 0.004 | 0.662 | 0.004 | 0.019 | (4)        | one less loss |
| 10   | 10   | 660.3        | 1.00E-29 | 8.00E-14 | 0     | 2.00E-287 | 0     | 0     | 0     | 0     | (1,3,4)    | 2             |
| 7    | 11   | 513          | 3.00E-61 | 3.00E-18 | 0     | 2.00E-223 | 0     | 0     | 0     | 0     | (2,3,4)    | 2             |
| 11   | 12   | 840.5        | 1.00E-49 | 2.00E-16 | 0     | 0         | 0     | 0     | 0     | 0     | (1,2,4)    | 2             |
